# Supplementary material for: Analysis of Serum Metabolites to Diagnose Bicuspid Aortic Valve
Source: PubMed Central journal article supplement (PMC5109472; doi:10.1038/srep37023), 2016-11-15
Supplement: srep37023-s1.pdf [file srep37023-s1.pdf]

1           **Analysis of Serum metabolites to Diagnose Bicuspid Aortic Valve**

2

3           Wenshuo Wang<sup>1, ‡</sup>, Aikebaier Maimaiti<sup>1, ‡</sup>, Yun Zhao<sup>1</sup>, Lingfei Zhang<sup>2</sup>,  
4           Hongyue Tao<sup>3</sup>, Hui Nian<sup>1</sup>, Limin Xia<sup>1</sup>, Biao Kong<sup>4</sup>, Chunsheng Wang<sup>1, \*</sup>,  
5                                                   Mofang Liu<sup>2, \*</sup>, Lai Wei<sup>1, \*</sup>

6

7           1. Department of Cardiac Surgery, Zhongshan Hospital, Fudan University.

8           200032, Shanghai, China

9           2. State Key Laboratory of Molecular Biology, Shanghai Key Laboratory of

10          Molecular Andrology, Institute of Biochemistry and Cell Biology, Shanghai

11          Institutes for Biological Sciences, Chinese Academy of Sciences, 200031,

12          Shanghai, China.

13          3. Department of Radiology, Huashan Hospital, Fudan University. 200040,

14          Shanghai, China

15          4. Department of Chemistry, Laboratory of Advanced Materials, Fudan

16          University, 200433, Shanghai, China

17

18          ‡ These authors contributed equally to this work

19

20          \* Corresponding authors:

21          Lai Wei

22 Telephone Number: +86 (21) 64041990

23 Fax Number: +86 (21) 64041990

24 Email address: weilai\_zs@sina.com

25 Mofang Liu

26 Telephone Number: +86 (21) 54921146

27 Fax Number: +86 (21) 54921146

28 Email address: liumofang@sohu.com

29 Chunsheng Wang

30 Telephone Number: +86 (21) 64041990

31 Fax Number: +86 (21) 64041990

32 Email address: zswangchunsheng@sina.com

33

34

35

36

37

38

39

40

41

42

43 **Supplementary Material**

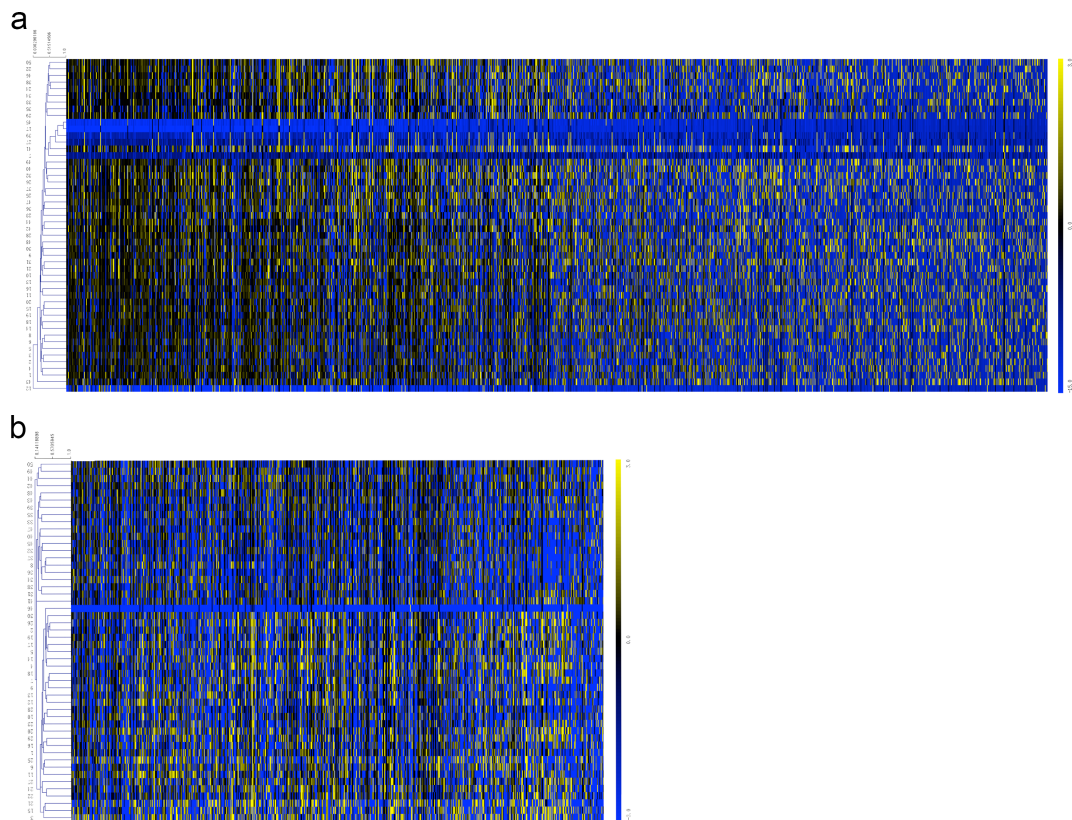

44

45 **Figure 1.** The metabolic profiles of BAV patients versus healthy participants.

46 Heat maps of metabolite features identified from members of the

47 patient group and control group under negative-ion mode (a) and

48 positive-ion mode (b) were shown. The data were displayed on a

49 log<sub>2</sub> scale and clustered based on Spearman distance.

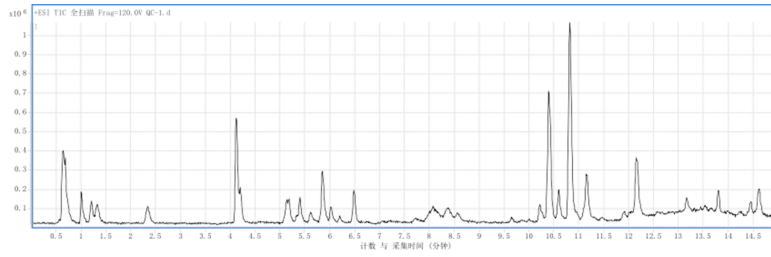

Total Ions Chromatograph  
of QC in positive mode

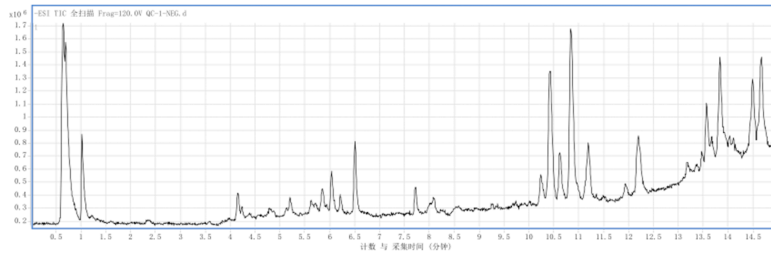

Total Ions Chromatograph  
of QC in negative mode

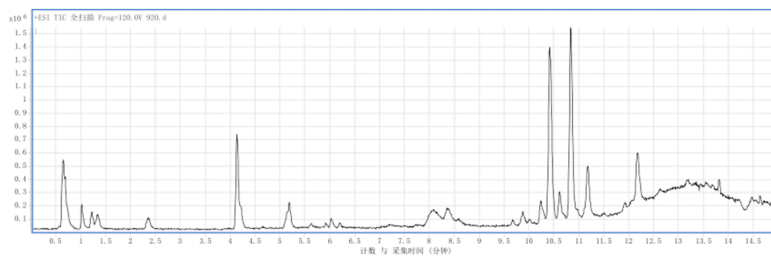

Total Ions Chromatograph of  
patients with BAV in positive mode

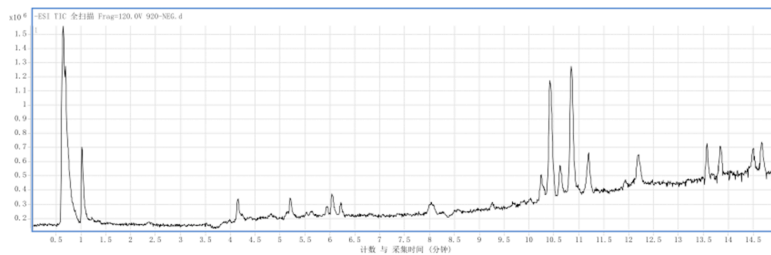

Total Ions Chromatograph of  
patients with BAV in negative mode

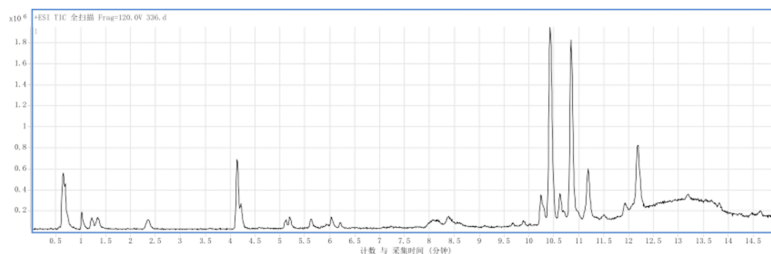

Total Ions Chromatograph  
of control in positive mode

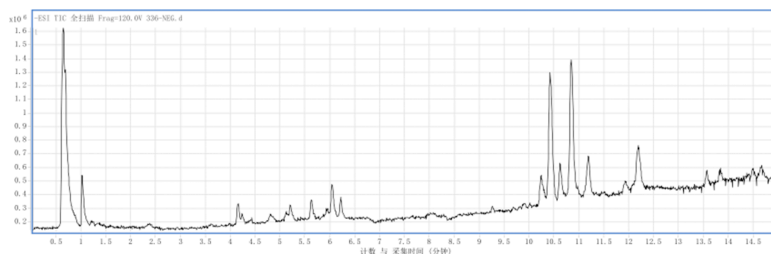

Total Ions Chromatograph  
of control in negative mode

50

51 **Figure 2.** The TIC of all groups in positive- and negative-ion modes. TIC =

52 total ions chromatography

53

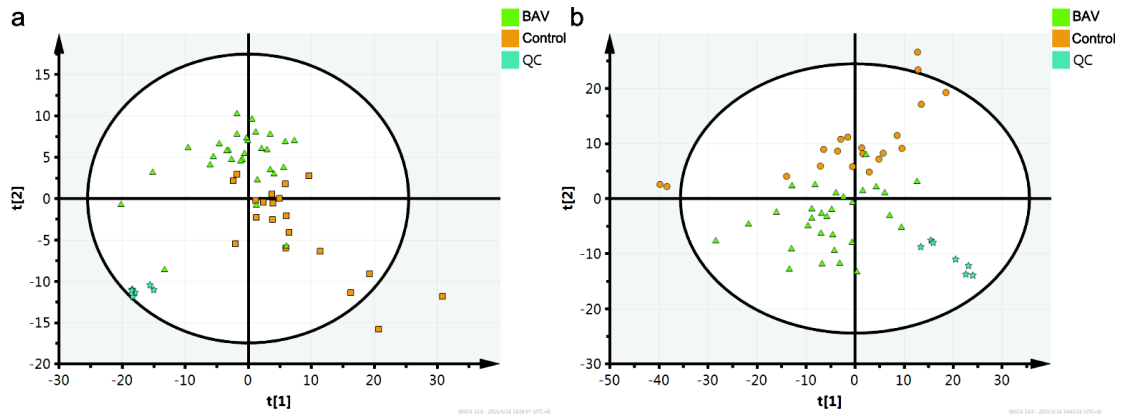

54

55 **Figure 3.** The PCA scores of patients with BAV and controls in positive- (a)

56

and negative-ion (b) modes. PCA = Principle Component Analysis.

57

BAV = bicuspid aortic valve. QC = Quality Control.

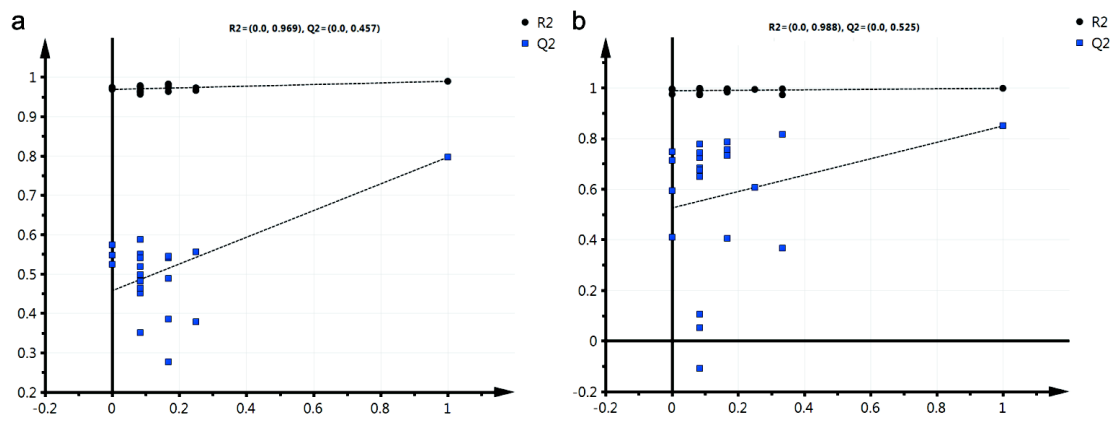

58

59 **Figure 4.** The validation of PLS-DA models in positive (a) and negative (b)

60

mode. PLS-DA = Partial Least Squares Discriminant Analysis.

| Metabolites                                | R       | P-value |
|--------------------------------------------|---------|---------|
| Gluconic acid                              | 0.2813  | 0.0478  |
| Inosine                                    | 0.2805  | 0.0485  |
| HETE                                       | 0.2884  | 0.0422  |
| HpOTrE                                     | 0.3542  | 0.0116  |
| Purine                                     | 0.3762  | 0.0071  |
| HOME                                       | 0.3379  | 0.0164  |
| Clupanodonic acid                          | 0.3331  | 0.0181  |
| palmitoleic acid                           | 0.3154  | 0.0257  |
| Oleic Acid                                 | 0.3855  | 0.0057  |
| Linoleic acid                              | 0.4484  | 0.0006  |
| Glycerophospho-N-Palmitoyl Ethanolamine    | 0.2828  | 0.0466  |
| MG(18:4)                                   | 0.3566  | 0.0110  |
| Uridine                                    | 0.3811  | 0.0063  |
| Clupanodonic acid                          | 0.3513  | 0.0124  |
| LysoPE(22:5)                               | 0.3000  | 0.0343  |
| Isoleucine/Leucine                         | -0.3263 | 0.0207  |
| Tryptophan                                 | -0.3797 | 0.0065  |
| Ketoleucine                                | -0.4126 | 0.0029  |
| Uridine                                    | -0.3152 | 0.0258  |
| DL-2-hydroxy valeric acid                  | -0.3203 | 0.0233  |
| 5-S-Cysteinyldopamine                      | -0.4024 | 0.0038  |
| Deoxyuridine monophosphate (dUMP)          | -0.2984 | 0.0353  |
| Palmitic acid                              | -0.3217 | 0.0227  |
| PE(20:1)                                   | -0.4385 | 0.0014  |
| D-myo-Inositol-tetraphosphate              | -0.3656 | 0.0090  |
| Adenosine                                  | 0.3522  | 0.0121  |
| Se-Methylselenomethionine                  | 0.4308  | 0.0018  |
| MG(18:2)                                   | 0.4637  | 0.0007  |
| Acetylcarnitine                            | 0.3079  | 0.0296  |
| Linolenic Acid                             | 0.4093  | 0.0032  |
| N-palmitoyl alanine                        | 0.4042  | 0.0036  |
| Bilirubin                                  | 0.3513  | 0.0124  |
| Glycerophospho-N-Oleoyl Ethanolamine       | 0.4711  | 0.0006  |
| Glycerophospho-N-Arachidonoyl Ethanolamine | 0.3668  | 0.0088  |
| PE(18:2)                                   | 0.4537  | 0.0009  |
| PC(16:0)                                   | -0.3496 | 0.0128  |
| Hypoxanthine                               | -0.2861 | 0.0440  |
| Choline                                    | -0.3183 | 0.0243  |
| Dodecanoylcarnitine                        | -0.4446 | 0.0012  |
| PC(20:4)                                   | -0.3795 | 0.0066  |
| N-palmitoyl threonine                      | -0.3251 | 0.0212  |

62 **Table 1.** The correlation of metabolites with BAV. BAV = bicuspid aortic  
63 valve
